# Supplementary material
Source: PubMed Central journal article supplement (PMC3868879)
Supplement: supp_113.208389_Supp_Fig1_JPET208389.pdf [file supp_113.208389_Supp_Fig1_JPET208389.pdf]

Supplemental Figure 1

**Title:** The unique  $\alpha 4(+)/(-)\alpha 4$  agonist binding site in  $(\alpha 4)_3(\beta 2)_2$  subtype nicotinic acetylcholine receptors permits differential agonist desensitization pharmacology vs. the  $(\alpha 4)_2(\beta 2)_3$  subtype.

**Authors:** Eaton, Lucero, Stratton, Chang, Cooper, Lindstrom, Lukas, Whiteaker.

**Journal:** Journal of Pharmacology and Experimental Therapeutics

**A**

|            |                                                              |    |
|------------|--------------------------------------------------------------|----|
| $\alpha 4$ | HVETRAHAEERLLKLF--SGYNKWSRPVANI SDVVLVRFGLSIAQLIDVDEKNQMMTTN | 86 |
| $\beta 2$  | -----TDTEERLVEHLLDPSRYNKLIRPATNGSELVTVQLMVSLAQLISVHEREQIMTTN | 83 |

  

|            |                                                                |              |
|------------|----------------------------------------------------------------|--------------|
|            | <u>LoopA</u>                                                   |              |
| $\alpha 4$ | VWVKQEWHDYKLRWDPADYENVTSIRIPSELIWRPDIVLYNNADGDFAVTHLTKAHLFHD   | 146          |
| $\beta 2$  | VWLTQEWEDYRLTWKPEEFDNMKKVRLPSKHIWLPDVVLYNNADGMYEVSFY SNAVVS YD | 143          |
|            | <u>LoopD</u>                                                   | <u>LoopE</u> |

  

|            |                                                               |     |
|------------|---------------------------------------------------------------|-----|
|            | <u>LoopB</u>                                                  |     |
| $\alpha 4$ | GRVQWTPPAIYKSSCSIDVTFPPFDQQNCTMKFGS WTYDKAKIDLVMH SRVDQLDFWES | 206 |
| $\beta 2$  | GSIFWLPPAIYKSACKIEVKHFPFDQQNCTMKFRSWTYDRTEIDLVLKSEVASLDDFTPS  | 203 |
|            | <u>LoopF</u>                                                  |     |

  

|            |                                           |     |
|------------|-------------------------------------------|-----|
|            | <u>LoopC</u>                              |     |
| $\alpha 4$ | GEWVI VDAVGTYNTRK YEC CAEI YPDITYAFVIRRLP | 243 |
| $\beta 2$  | GEWDIVALPGRRNENPDDS---TYVDITYDFIIRK P     | 237 |

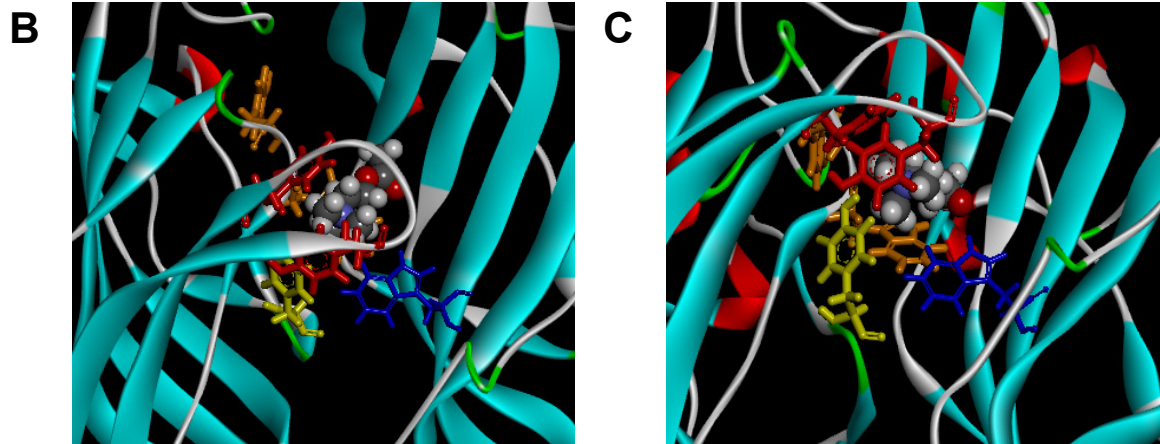

Mutation of the putative  $\alpha 4(+)/(-)\alpha 4$  agonist binding pocket. **A:** Conserved structural loops line agonist binding pockets formed by the nAChR  $\alpha 4(+)$  face (Loops A-C) and neighboring  $\alpha 4(-)$  face (Loops D-F; see Methods for fuller description). The aromatic residues mutated in this study are color-highlighted according to their location within Loops A-D. Note that for this figure the conventional numbering scheme, beginning at the start methionine of each wild-type subunit, is used. **B:** Model of the  $\alpha 4(+)/(-)\alpha 4$  agonist binding site; based on the 3SQ6 PDB file. There is considerable amino acid conservation between  $\alpha 4$  and  $\beta 2$ -nAChR subunits, including within the binding pocket loops. This allows formation of an additional agonist binding pocket at the  $\alpha 4(+)/(-)\alpha 4$  interface only present in the LS  $\alpha 4\beta 2$ -nAChR isoform (Harpsoe et al., 2011; Mazzaferro et al., 2011). Principal (+) face Loops A-C are contributed by the  $\alpha 4$  subunit in LSP position 5 (left), and complementary (-) face Loops D-F are contributed by the  $\alpha 4$  subunit in LSP position 4 (right). Residues mutated in this study are color-coded as for panel A with docked ACh shown in the binding center. The binding pocket is viewed facing directly towards Loop C. **C:** Same model as in Panel B, but viewing the binding pocket from below Loop C.
